# Supplementary material
Source: PubMed Central journal article supplement (PMC2832097)
Supplement: NIHMS178306-supplement-1.pdf [file NIHMS178306-supplement-1.pdf]

# Mechanistic insights on riboflavin synthase inspired by selective binding of the 6,7-dimethyl8-8ribityllumazine exomethylene anion

Ryu-Ryun Kim<sup>1</sup>, Boris Illarionov<sup>2</sup>, Monika Joshi<sup>3</sup>, Mark Cushman<sup>4</sup>, Chan Yong Lee<sup>5</sup>, Wolfgang Eisenreich<sup>3</sup>, Markus Fischer<sup>1\*</sup> and Adelbert Bacher<sup>2,3\*</sup>

## SUPPORTING INFORMATION

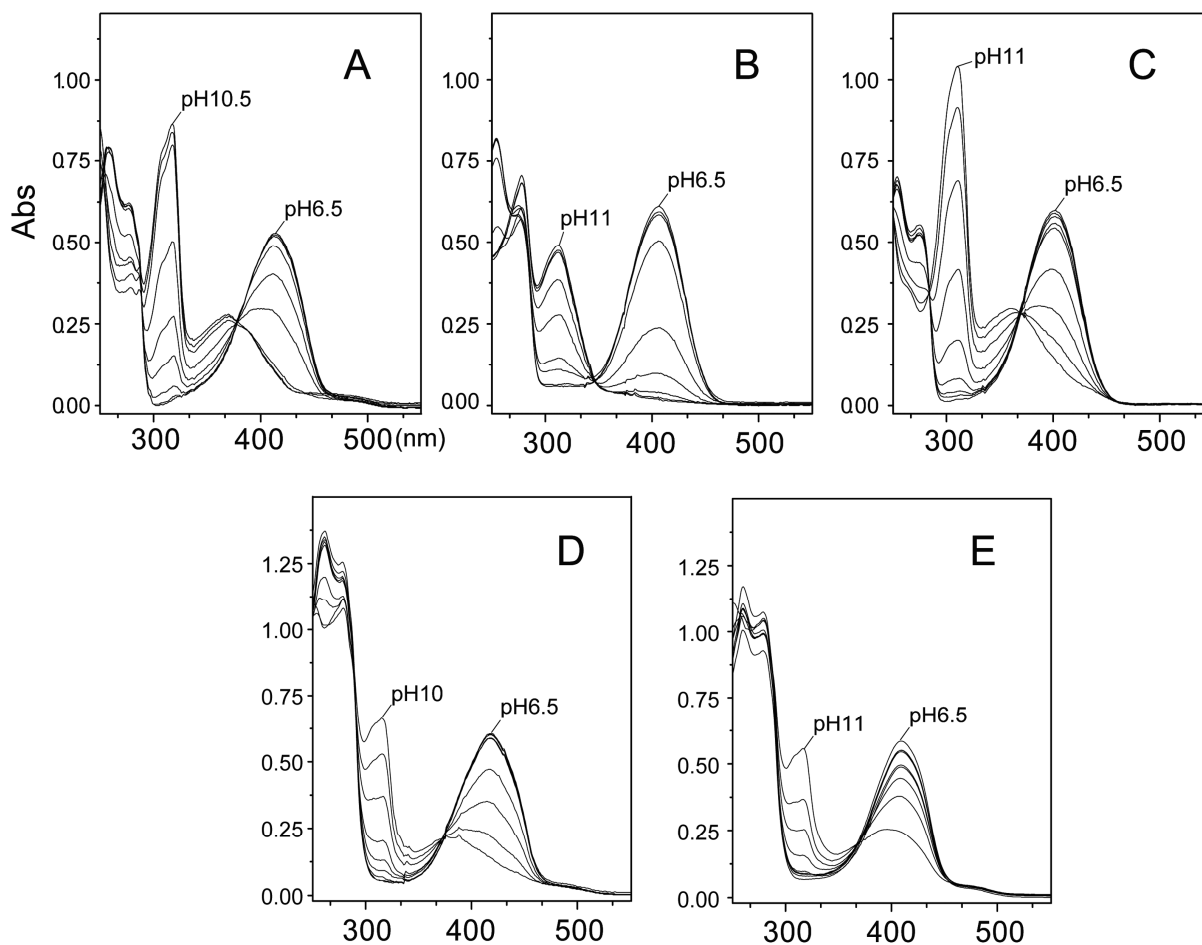

**Fig. S1.** Photometric titration of lumazine derivatives. pH of the samples was varied from neutral to alkaline values. A, **1** in complex with the N-terminal domain of riboflavin synthase (NRS); B, **1** in aqueous solution; C, **6** in aqueous solution; D, **1** in complex with the T67A mutant of NRS; E, **1** in complex with the T50A mutant of NRS.

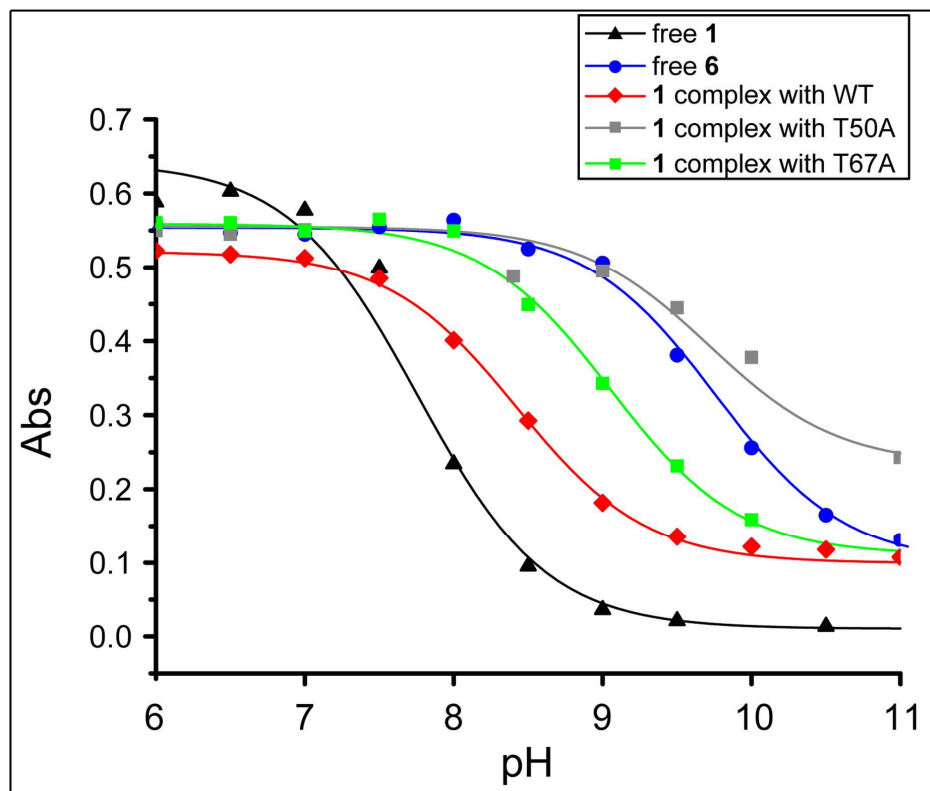

**Fig. S2.** Photometric titration curves of lumazine derivatives at 410 nm. NRS, wild type *E. coli* riboflavin synthase, N-terminal domain; T67A and T50A are respective mutants of NRS.

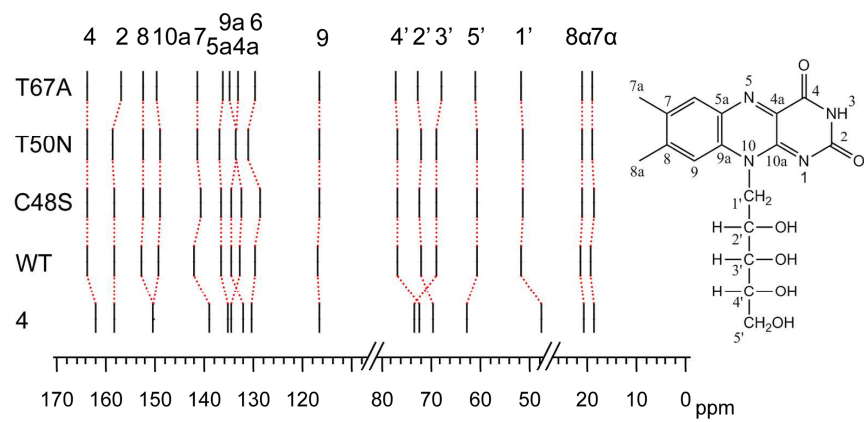

**Fig. S3.**  $^{13}\text{C}$  chemical shifts of riboflavin in aqueous solution (**4**) and in complex with the N-terminal domain of riboflavin synthase [wild type (WT) and mutants T67A, T50N, C48S] at pH 6.9.

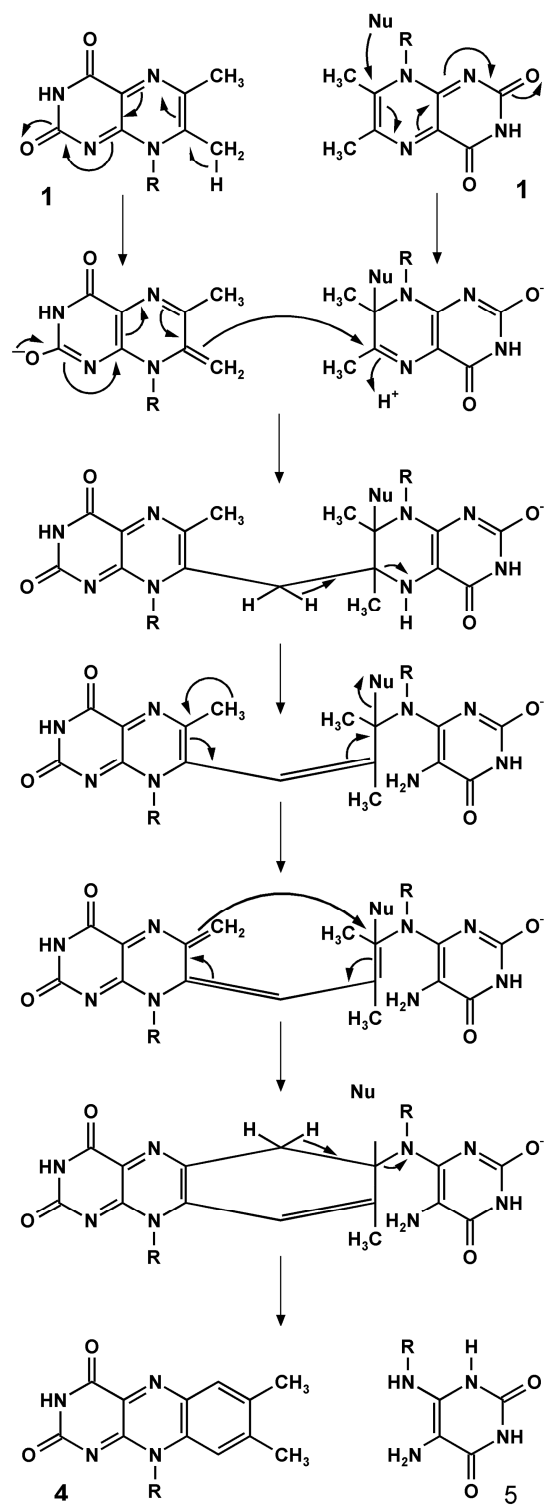

Scheme S1. Hypothetical reaction mechanism proposed in the 1960s by Plaut, Wood and their coworkers.<sup>10,13</sup> Nu, unknown nucleophile.

Table S1. NMR data of [U-<sup>13</sup>C<sub>13</sub>]-**1**-, [5-<sup>15</sup>N<sub>1</sub>]-**1**-, [8-<sup>15</sup>N<sub>1</sub>]-**1**-, and [U-<sup>15</sup>N<sub>4</sub>]-**1**-complex with the N-terminal domain of riboflavin synthase wild type (WT) or mutants at pH 6.9 or 11.0. **A**, <sup>13</sup>C-NMR chemical shifts (δ<sup>13</sup>C, ppm) **B**, <sup>15</sup>N-NMR chemical shifts (δ<sup>15</sup>N, ppm).

**A.**

| Position | WT     |       | C48A   |       | C48S   |       | T50A   |       | T67A   |       |
|----------|--------|-------|--------|-------|--------|-------|--------|-------|--------|-------|
|          | pH 6.9 | pH 11 |
| 4        | 165.9  | 164.0 | 165.9  | 164.1 | 166.0  | 164.0 | 165.7  | 163.8 | 165.9  | 164.0 |
| 2        | 159.4  | 160.2 | 159.4  | 160.2 | 159.4  | 160.2 | 159.7  | 160.1 | 158.2  | 159.3 |
| 7        | 157.1  | 143.2 | 157.5  | 142.3 | 158.3  | 142.9 | 155.7  | 143.1 | 156.6  | 143.0 |
| 8a       | 151.5  | 155.2 | 151.5  | 155.2 | 151.4  | 155.2 | 151.3  | 154.6 | 151.9  | 155.4 |
| 6        | 148.6  | 152.0 | 148.2  | 152.2 | 149.5  | 153.3 | 148.6  | 150.6 | 147.5  | 151.5 |
| 4a       | 130.8  | 106.0 | 130.6  | 105.6 | 130.2  | 105.7 | 131.4  | 106.0 | 130.8  | 105.9 |
| 4'       | 78.2   | 78.3  | 78.1   | 78.1  | 78.1   | 78.1  | 78.3   | 77.9  | 78.7   | 78.7  |
| 2'       | 73.9   | 75.3  | 74.1   | 75.5  | 74.1   | 75.6  | 73.9   | 75.1  | 74.4   | 75.8  |
| 3'       | 70.2   | 70.0  | 70.4   | 70.1  | 70.4   | 70.0  | 70.2   | 69.8  | 69.2   | 69.3  |
| 5'       | 62.6   | 62.5  | 62.3   | 62.5  | 62.2   | 62.5  | 62.4   | 62.2  | 62.6   | 62.5  |
| 1'       | 57.1   | 50.6  | 56.6   | 49.4  | 56.7   | 49.4  | 56.9   | 50.5  | 57.0   | 50.8  |
| 6α       | 23.3   | 22.8  | 22.5   | 22.4  | 22.3   | 22.0  | 24.1   | 23.7  | 23.2   | 22.7  |
| 7α       | 19.9   | 88.9  | 20.4   | 89.2  | 20.1   | 89.4  | 19.7   | 87.1  | 19.8   | 88.0  |

**B.**

| Position | [5- <sup>15</sup> N <sub>1</sub> ] <b>1</b> with WT |       | [8- <sup>15</sup> N <sub>1</sub> ] <b>1</b> with WT |       | [U- <sup>15</sup> N <sub>4</sub> ] <b>1</b> with WT |       | [U- <sup>15</sup> N <sub>4</sub> ] <b>1</b> with T50A |       | [U- <sup>15</sup> N <sub>4</sub> ] <b>1</b> with T67A |       |
|----------|-----------------------------------------------------|-------|-----------------------------------------------------|-------|-----------------------------------------------------|-------|-------------------------------------------------------|-------|-------------------------------------------------------|-------|
|          | pH 6.9                                              | pH 11 | pH 6.9                                              | pH 11 | pH 6.9                                              | pH 11 | pH 6.9                                                | pH 11 | pH 6.9                                                | pH 11 |
| 1        |                                                     |       |                                                     |       | 183.9                                               | 183.2 | 183.0                                                 | 181.5 | 185.8                                                 | 185.5 |
| 3        |                                                     |       |                                                     |       | 162.4                                               | 150.3 | 162.1                                                 | 150.6 | 162.7                                                 | 149.9 |
| 5        | 327.6                                               | 274.0 |                                                     |       | 327.5                                               | 273.8 | 340.8                                                 | 284.0 | 326.5                                                 | 274.7 |
| 8        |                                                     |       | 197.9                                               | 118.5 | 197.7                                               | 118.5 | 196.5                                                 | 118.3 | 196.9                                                 | 118.3 |

Table S2. NMR data of [U-<sup>13</sup>C]<sub>17</sub>-**4** in complex with the N-terminal domain of riboflavin synthase [wild type (WT) and mutants T67A, T50N, C48S].

| Position   | Chemical shifts, $\delta^{13}\text{C}$ (ppm) |       |       |       |
|------------|----------------------------------------------|-------|-------|-------|
|            | WT                                           | C48S  | T50N  | T67A  |
| 4          | 165.5                                        | 165.5 | 165.3 | 165.5 |
| 2          | 159.9                                        | 159.8 | 160.1 | 158.7 |
| 8          | 154.4                                        | 154.1 | 153.9 | 154.2 |
| 10a        | 150.9                                        | 150.8 | 150.6 | 151.3 |
| 7          | 143.7                                        | 142.5 | 142.9 | 143.2 |
| 5a         | 138.3                                        | 138.5 | 138.7 | 137.9 |
| 9a         | 136.3                                        | 136.3 | 135.3 | 136.4 |
| 4a         | 134.4                                        | 134.2 | 135.2 | 134.7 |
| 6          | 131.4                                        | 130.5 | 132.9 | 131.4 |
| 9          | 118.6                                        | 118.4 | 118.3 | 118.4 |
| 4'         | 78.5                                         | 78.3  | 78.4  | 78.7  |
| 2'         | 73.6                                         | 73.8  | 73.6  | 74.2  |
| 3'         | 70.3                                         | 70.3  | 70.4  | 69.4  |
| 5'         | 62.1                                         | 62.2  | 62.2  | 62.6  |
| 1'         | 53.1                                         | 52.9  | 52.9  | 53.3  |
| 8 $\alpha$ | 22.8                                         | 22.5  | 22.6  | 22.7  |
| 7 $\alpha$ | 20.8                                         | 20.3  | 20.7  | 20.8  |

Table S3. Plasmids and bacterial strains used in this study.

| Strains/Plasmids          | Relevant characteristics                                                                                  | Source                              |
|---------------------------|-----------------------------------------------------------------------------------------------------------|-------------------------------------|
| <b>Strains</b>            |                                                                                                           |                                     |
| <i>E. coli</i> XL-1 Blue  | Cloning strain                                                                                            | Stratagene                          |
| <i>E. coli</i> M15[pREp4] | Expression strain                                                                                         | Qiagen                              |
| <b>Plasmids</b>           |                                                                                                           |                                     |
| pQE30                     | Expression vector                                                                                         |                                     |
| pERN                      | pNCO113 containing the gene for the wild type N-terminal domain of <i>E. coli</i> riboflavin synthase     | Eberhardt et al.,2001 <sup>19</sup> |
| pERN-C48S                 | pNCO113 containing the gene for the C48S mutant N-terminal domain of <i>E. coli</i> riboflavin synthase   | Eberhardt et al.,2001 <sup>19</sup> |
| NRS-WT                    | pQE30 containing the gene for the wild type N-terminal domain of <i>E. coli</i> riboflavin synthase       | This study                          |
| NRS-mutant variants       | pQE30 containing the gene for the mutant variants N-terminal domain of <i>E. coli</i> riboflavin synthase | This study                          |

Table S4. Oligonucleotides used in this study.

| Primer  | Amino acid replacement | Novel restriction site | Nucleotide sequence (5'→3') <sup>a</sup>       |
|---------|------------------------|------------------------|------------------------------------------------|
| Forward | None                   | <i>Bam</i> H I         | GAGGAGAAAGGATCCATGTTTACGG                      |
| Reverse | None                   | <i>Pst</i> I           | GTCCTGCAGTTAGTGTCCGCC                          |
| 1       | C48→A                  | <i>Hph</i> I           | CCGTCACGGTGAG <b>GGC</b> GCAACCGTTATG          |
| 2       | T50→A                  | <i>Hinf</i> I          | GACATGATTCCCGTTAATTTCCGTCAC <b>GGCC</b> CAGGCA |
| 3       | T67→A                  | <i>Sna</i> BI          | CGCCAAGATTGGTAATACGTAAC <b>CGC</b> TTCTTTCAT   |

<sup>a</sup> Codons specifying modified amino acid residues are shown in bold type. Restriction sites are underlined.
